# Supplementary material
Source: Springer Nature journal article supplement (https://www.springermedizin.de/resource/supplementary/12911_2013_751_MOESM1_ESM.pdf/9526598)
Supplement: MOESM1 [file 9526598]

**Table S1: Key Messages for Presenting Quantitative Information about Decision Outcomes**

| <p align="center"><b>Communication Issues<br/>In Presenting Quantitative Information</b></p> | <p align="center"><b>Key Messages</b></p>                                                                                                                                                                                                                                                                                                                                                                                                                                                                                                                                                                                                                                                                                                                                                                                                                                                                                                                                                                                 |
|----------------------------------------------------------------------------------------------|---------------------------------------------------------------------------------------------------------------------------------------------------------------------------------------------------------------------------------------------------------------------------------------------------------------------------------------------------------------------------------------------------------------------------------------------------------------------------------------------------------------------------------------------------------------------------------------------------------------------------------------------------------------------------------------------------------------------------------------------------------------------------------------------------------------------------------------------------------------------------------------------------------------------------------------------------------------------------------------------------------------------------|
| <p>Presenting the Chance an Event Will Occur</p>                                             | <ul style="list-style-type: none"> <li>• Ideal formats depend on the task that the recipient faces.</li> <li>• Use simple frequency (e.g., x in 100) or simple percentage (e.g., x%) formats that explicitly specify the reference class over time.               <ul style="list-style-type: none"> <li>○ Using both formats together does not appear to provide benefits.</li> </ul> </li> <li>• When comparing two independent events, the simple percentage format appears to be better understood than the simple frequency format, possibly because fewer numbers are simpler to process.               <ul style="list-style-type: none"> <li>○ Specifying the reference class over time is essential.</li> <li>○ Format biases may exist with very small numbers and for the less numerate. These may be partly corrected by use of appropriate visual display formats (see Section 6).</li> <li>○ Use consistent denominators with simple frequency formats (i.e., no “1-in-X” formats”).</li> </ul> </li> </ul> |
| <p>Presenting Changes in Numeric Outcomes</p>                                                | <ul style="list-style-type: none"> <li>• Use absolute risk presentations (either simple frequencies or percentages) rather than relative risk presentations (e.g. “30% lower risk”), as the latter tend to magnify risk perceptions and decrease understanding.               <ul style="list-style-type: none"> <li>○ Maintain constant denominators across statistics.</li> </ul> </li> <li>• Incremental risk formats (absolute risk increase or decrease) may be valuable if accompanied by visual displays.</li> </ul>                                                                                                                                                                                                                                                                                                                                                                                                                                                                                               |
| <p>Outcome Estimates for Tests and Screening Decisions</p>                                   | <ul style="list-style-type: none"> <li>• Use of “natural frequencies” (frequency representations that use a common, fixed reference class of cases) can improve peoples’ understanding and estimates of joint occurrence risks (e.g., the probability of having breast cancer given an abnormal mammography result).               <ul style="list-style-type: none"> <li>○ Representations of the calculated “post-test probability” may be communicated as percentages if that simplifies the user’s task.</li> </ul> </li> </ul>                                                                                                                                                                                                                                                                                                                                                                                                                                                                                       |

|                                                                  |                                                                                                                                                                                                                                                                                                                                                                                                                                                                                                                                                                                                                                                                 |
|------------------------------------------------------------------|-----------------------------------------------------------------------------------------------------------------------------------------------------------------------------------------------------------------------------------------------------------------------------------------------------------------------------------------------------------------------------------------------------------------------------------------------------------------------------------------------------------------------------------------------------------------------------------------------------------------------------------------------------------------|
| <p>Numerical Estimates in Context and with Evaluative Labels</p> | <ul style="list-style-type: none"> <li>• Contextual data (e.g., providing the risk of conditions other than the target condition) can help users get perspective on their risk of disease. <ul style="list-style-type: none"> <li>○ Providing such data should be considered when feasible.</li> </ul> </li> <li>• Directly interpreting the meaning of risk data (e.g., by providing evaluative labels such as “poor”) has a substantial impact on people’s reactions. <ul style="list-style-type: none"> <li>○ Because the appropriateness of such reactions varies, evaluative labels should be applied carefully.</li> </ul> </li> </ul>                    |
| <p>Communicating Uncertainty</p>                                 | <ul style="list-style-type: none"> <li>• Care should be taken to distinguish between the randomness of future events and “ambiguity” (a lack of knowledge needed to predict the likelihood of future outcomes).</li> <li>• Many people exhibit “ambiguity aversion,” avoiding decision making and showing affective responses to situations described as having epistemic uncertainty.</li> <li>• Little consensus exists regarding how best to communicate these concepts.</li> </ul>                                                                                                                                                                          |
| <p>Visual Formats</p>                                            | <ul style="list-style-type: none"> <li>• Visual displays such as pictographs/icon arrays and bar charts can improve understanding, especially among the less numerate <ul style="list-style-type: none"> <li>○ People vary in their graph literacy, i.e., their ability to extract data and meaning from visual displays.</li> </ul> </li> <li>• Visual displays convey essential or “gist” information more than precise information. <ul style="list-style-type: none"> <li>○ Bars and pictographs are perceived most accurately and easily, especially when they depict the part-whole relationship by showing the entire population.</li> </ul> </li> </ul> |
| <p>Tailoring Estimates to Individual Characteristics</p>         | <ul style="list-style-type: none"> <li>• Research is mixed regarding the effect of tailoring risk information.</li> </ul>                                                                                                                                                                                                                                                                                                                                                                                                                                                                                                                                       |
| <p>Formats for Understanding Outcomes Over Time</p>              | <ul style="list-style-type: none"> <li>• Efforts to estimate risk over time are often hampered by a lack of data.</li> <li>• Multiple approaches can show risk over time, including chance of a specific outcome at a single point in the future, mortality or survival graphs, and lifetime risk estimates. <ul style="list-style-type: none"> <li>○ Research is needed to assess the relative strengths and weaknesses of different approaches</li> </ul> </li> </ul>                                                                                                                                                                                         |
| <p>Narrative Methods for Conveying the Chance of</p>             | <ul style="list-style-type: none"> <li>• The proportion of favorable vs. unfavorable narratives can influence perceptions of</li> </ul>                                                                                                                                                                                                                                                                                                                                                                                                                                                                                                                         |

|                                                        |                                                                                                                                                                                                                                                                                                                                                                                                                                                                                                  |
|--------------------------------------------------------|--------------------------------------------------------------------------------------------------------------------------------------------------------------------------------------------------------------------------------------------------------------------------------------------------------------------------------------------------------------------------------------------------------------------------------------------------------------------------------------------------|
| an Event                                               | <p>risk and treatment choices.</p> <ul style="list-style-type: none"> <li>○ When used to present risk or benefit information, they should be accompanied by a visual display such as pictographs.</li> <li>● Narratives should be used with caution until research better clarifies their effects (both positive and negative).</li> </ul>                                                                                                                                                       |
| Important Skills for Understanding Numerical Estimates | <ul style="list-style-type: none"> <li>● Higher numeracy facilitates computations, interpretations of numbers, information seeking, depth of processing and, trust in numerical formats. <ul style="list-style-type: none"> <li>○ Lower numeracy is associated with overestimation of risk probabilities, higher susceptibility to other factors such as format, and denominator effect.</li> </ul> </li> <li>● Both objective and subjective measures of numeracy are now available.</li> </ul> |
| Interactive, Web-based Formats                         | <ul style="list-style-type: none"> <li>● While interactive, web-based formats can use motion cues or game-like interfaces to potentially reinforce risk messages, they may degrade knowledge unless these elements reinforce the most critical gist message.</li> </ul>                                                                                                                                                                                                                          |
